# Supplementary material for: Regional variation in health care utilization in Sweden – the importance of demand-side factors
Source: Springer Nature journal article supplement (doi:10.1186/s12913-018-3210-y), 2018-06-04
Supplement: MOESM1 [file 15817196]

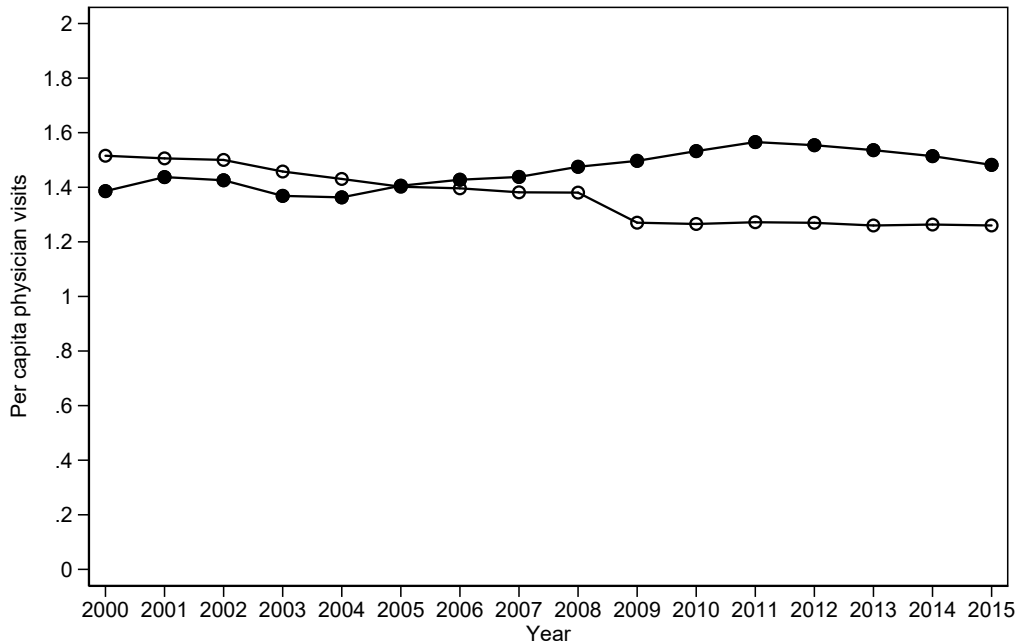

—●— Physician primary care      —○— Specialist outpatient care
